# Supplementary material
Source: publisher figshare collection journal article supplement (https://gsajournals.figshare.com/ndownloader/files/25512548)
Supplement: Supplementary file 1 [file 25512548]

## Sheet: Sheet1
Probe #	Probe sequence (5' -> 3')
1	TCACTGGAGACGAACACGTC
2	TTCAGTGCGGTTTTATCTTG
3	GGATTCGAACGGATCTTCGA
4	AATCTCACTTTCTTGGCGTT
5	TCTCAATACTGTTCACTGCA
6	TGGAATCTCACTGGATCTGA
7	CGGCGATAGGTGATTCATTT
8	TATCACAGTGTTGAAGGCGG
9	GATCTCGACCATTGAGTTTC
10	GAGCAGCGGGTTGTACAAAA
11	AAAATTGGGGCCACAGTAGG
12	CTGACCCAAAACCACAGAGG
13	TCAAGGCAAAGTCACGATCC
14	TTCATTTGGAGTTCATGCTC
15	CTTGCTGTTCTCATTGTTAT
16	GTGCTTAGATTTAGTGGCAT
17	GTTGGAATCATCCGATGTGA
18	TAACGTTCAGCGAGGTCATC
19	TTTAGATTCACAGCGCTCAG
20	TTGCTGTGGTGTACTCGAAC
21	CGGTGACCAGATGATGTTAC
22	GCTCATACTTGAACTTTCGC
23	ATTGCAGCGAGGATATGGAT
24	ATGGGCATACAACTGCTGTT
25	GACGAGGAGGACGAACGACG
26	TTCGTTTTCTCCTTGGTAAG
27	GTTTGCACTGGAAATTCCTG
28	ACGAACGCTTGAAGCTCTTG
29	TGTGGATGAGCAGATGTGTG
30	CCACAATATTGGCAGGGATA
31	ATGTCCGACTTTTGGTGGAA
32	GTATGTATGTACGTGTGCTT
33	TCATATGCGTGATCAGGTTG
34	TGGCAACCGAAGGGTTTATA
35	CTGGAAGGACTGATCGCAAA
36	ATCTCCTGGATCAGAGATTG
37	GTCCTGCTTAGCTAATACTG
38	TAGACTTAGGGCCAACTGTG
39	ACTTTGGCTTCATAGCAACG
40	TCTTTGCGAAGGCCTAAACA
41	CTTAAGGCAGTATCTTAGCT
42	GAGTCTTGTTTGGGATAACT
43	TAAGCTAGGGTTTAACGGCT
44	CTGCCAATTTTGGGTTAAGT
45	TGAGGTTGTTCTTTGGTACG
46	TTAGACAAGTGGTCGCCAAG
47	GTGGGTGATGCCATCAATAA
48	TTGTTCTCTTTTAGCTTTCA
